# Supplementary material for: Drug Treatment of Patients with Liver Cirrhosis in a Tertiary Hospital in Northern Ghana: Does It Comply with Recommended Guidelines?
Source: Int J Hepatol. 2020 May 28;2020:9750194. doi: 10.1155/2020/9750194 (PMC7275961; doi:10.1155/2020/9750194)
Supplement: Supplementary Materials — Appendix 1: criteria for liver function test. Appendix 2: criteria for diagnosis of etiology of liver cirrhosis. Appendix 3: criteria for diagnosis of complications of liver cirrhosis. Appendix 4: guideline recommendation for etiology treatment. Appendix 5: guideline recommendation for complication treatment. Appendix 6: guidelines on safety prescription. Appendix 7: dosing consideration in hepatic impairment. [file 9750194.f1.pdf]

## Appendixes

### Appendix 1: Criteria for liver function test

| Parameter                          | Reference range |
|------------------------------------|-----------------|
| Total protein                      | 66–83 g/L       |
| Albumin                            | 35–53 g/L       |
| Globulin                           | 20–40 g/L       |
| Aspartate aminotransferase (AST)   | 0–35 IU/L       |
| Alanine aminotransferase (ALT)     | 0–45 IU/L       |
| Alkaline phosphatase (ALP)         | 30–120 IU/L     |
| Gama-glutamyl transpeptidase (GGT) | 0–49 U/L        |
| Total bilirubin                    | 2–21 umol/L     |
| Direct bilirubin                   | ≤ 5.13 umol/L   |
| Indirect bilirubin                 | 1.7–17 umol/L   |

### Appendix 2: Criteria for diagnosis of etiology of liver cirrhosis

| Etiology of liver cirrhosis         | Criteria for diagnosis                                                                                                                                                                                                                                                                                                                                                                                                               |
|-------------------------------------|--------------------------------------------------------------------------------------------------------------------------------------------------------------------------------------------------------------------------------------------------------------------------------------------------------------------------------------------------------------------------------------------------------------------------------------|
| Chronic hepatitis B viral infection | <ul style="list-style-type: none"><li>• Positive hepatitis B surface antigen (HBsAg) for at least 6 months [11]</li></ul>                                                                                                                                                                                                                                                                                                            |
| Chronic hepatitis C viral infection | <ul style="list-style-type: none"><li>• Positive hepatitis C virus (HCV)-RNA for at least 6 months [16]</li></ul>                                                                                                                                                                                                                                                                                                                    |
| Alcoholic hepatitis                 | <ul style="list-style-type: none"><li>• History of alcohol intake of &gt; 3 standard drinks/day in men and &gt; 2 drinks standard/day in women for ≥ 6 months,</li><li>• Elevated liver enzymes; AST and ALT &gt; 1.5 times upper limit of normal but &lt; 400 IU, AST/ALT ratio &gt; 1.5</li><li>• Elevated serum total bilirubin &gt; 3mg/dl (51 umol/L)</li><li>• In the absence of other causes of liver disease. [34]</li></ul> |
| Hepatocellular carcinoma            | <ul style="list-style-type: none"><li>• Abdominal imaging (ultrasound) showing small hypoechoic/hyperechoic nodules or large mixed echogenic nodules together with elevated serum alpha fetoprotein &gt; 400 ng/ml [35]</li></ul>                                                                                                                                                                                                    |
| Cryptogenic liver disease           | <ul style="list-style-type: none"><li>• A diagnosis was made when no etiology was identified after extensive investigations. [36]</li></ul>                                                                                                                                                                                                                                                                                          |

### Appendix 3: Criteria for diagnosis of complications of liver cirrhosis

| Complication                     | Criteria for diagnosis                                                                                                                                                                                                                                                                 |
|----------------------------------|----------------------------------------------------------------------------------------------------------------------------------------------------------------------------------------------------------------------------------------------------------------------------------------|
| Ascites                          | <ul style="list-style-type: none"> <li>Clinical presence of abdominal distention with fluid thrill and shifting dullness or</li> <li>Presence of free intraperitoneal fluid by abdominal imaging (e.g. ultrasound) [23]</li> </ul>                                                     |
| Coagulopathy                     | <ul style="list-style-type: none"> <li>Clinical presence of spontaneous bleeding or easy bruising and prothrombin time (PT) &gt; 4 secs of the control [37] in the absence of anticoagulation therapy and other causes of coagulopathy.</li> </ul>                                     |
| Gastrointestinal bleeding        | <ul style="list-style-type: none"> <li>Clinical presence of hematemesis, melena, or hematochezia</li> </ul>                                                                                                                                                                            |
| Esophageal varices               | <ul style="list-style-type: none"> <li>Findings of collateral veins/vessels within the walls of the esophagus by imaging techniques e.g. endoscopy. [38]</li> </ul>                                                                                                                    |
| Hepatic encephalopathy           | <ul style="list-style-type: none"> <li>Neurologic and psychiatric manifestations, including alterations in intellectual capacity, memory, emotional, behavioral, psychomotor speed, and fine motor skills. [39].</li> </ul>                                                            |
| Jaundice                         | <ul style="list-style-type: none"> <li>Clinical presence of yellowish coloration of the sclera, and/or skin.</li> </ul>                                                                                                                                                                |
| Portal hypertension              | <ul style="list-style-type: none"> <li>Clinical presence of distended superficial abdominal veins (caput medusa) and/or</li> <li>Findings of dilated portal vein, collateral vessels/varices, splenomegaly, and ascites by imaging studies e.g. endoscopy, ultrasound [26].</li> </ul> |
| Acute kidney injury              | <ul style="list-style-type: none"> <li>Increase in serum creatinine <math>\geq 0.3</math> mg/dL (<math>\geq 26.5</math>umol/L) from baseline within 48 hours in the patients cirrhosis.[6]</li> </ul>                                                                                  |
| Hypoalbuminemia                  | <ul style="list-style-type: none"> <li>Clinical significant hypoalbuminemia: Serum albumin level &lt; 25g/L [40]</li> </ul>                                                                                                                                                            |
| Spontaneous Bacteria Peritonitis | <ul style="list-style-type: none"> <li>Ascitic fluid neutrophil count &gt; 250 cells/mm<sup>3</sup> with or without positive culture.[6]</li> </ul>                                                                                                                                    |
| Hyponatremia                     | <ul style="list-style-type: none"> <li>Serum sodium concentration &lt; 130 mmol/L [6]</li> </ul>                                                                                                                                                                                       |

### Appendix 4: Guidelines recommendation for aetiology treatment

| Aetiology           | First-line medication                                                                                                      | Second-line medication                                                                                                   |
|---------------------|----------------------------------------------------------------------------------------------------------------------------|--------------------------------------------------------------------------------------------------------------------------|
| Chronic hepatitis B | Tenofovir disoproxil fumarate: 300mg PO daily<br>Tenofovir alafenamide: 25mg PO daily<br>Entecavir: 0.5mg PO daily<br>[11] | Tenofovir disoproxil fumarate: 300mg PO daily<br>Tenofovir alafenamide: 25mg PO daily<br>Entecavir: 1mg PO daily<br>[11] |

|                             |                                                                                                                                                                                                                                                        |                                                                                                                         |
|-----------------------------|--------------------------------------------------------------------------------------------------------------------------------------------------------------------------------------------------------------------------------------------------------|-------------------------------------------------------------------------------------------------------------------------|
| Chronic hepatitis C         | Sofosbuvir/Velpatasvir:<br>400mg/100mg tab daily<br>Sofosbuvir/Daclatasvir:<br>Glecaprevir/Pibrentasvir<br>[16]                                                                                                                                        | Sofosbuvir/Velpatasvir/<br>Voxilaprevir:<br>400mg/100mg/100mg tab daily<br>[16]                                         |
| HCC                         | Systemic therapy<br>Sorafenib; 400mg PO 12 hourly<br>Lenvatinib; < 60 kg: 8mg PO<br>daily, ≥ 60 kg: 12mg PO daily<br>[42]                                                                                                                              | Systemic therapy<br>Regorafenib: 160mg PO daily<br>Nivolumab; 240mg IV every 2<br>weeks, 480mg IV every 4 weeks<br>[42] |
| Alcoholic liver<br>diseases | Alcoholic hepatitis:<br>Prednisolone; 40mg PO daily<br><br>Prevention of alcoholic relapse:<br>Baclofen; 30–60 mg/day<br><br>Alcohol withdrawal:<br>Diazepam; 5–10mg PO 6-8<br>hourly<br><br>Wernicke encephalopathy:<br>Thiamine; 50-100 mg/day IM/IV |                                                                                                                         |

#### Appendix 5: Guidelines recommendation for complication treatment

| Complication | First-line medication                                                                                                                                                                                                           | Second-line medication                                                                        |
|--------------|---------------------------------------------------------------------------------------------------------------------------------------------------------------------------------------------------------------------------------|-----------------------------------------------------------------------------------------------|
| Ascites      | Spironolactone: 100mg daily<br>up to 400mg<br>Spironolactone +Furosemide:<br>100mg:40mg daily up to<br>400mg:160mg daily<br>[22]                                                                                                | Amiloride, Torasemide,<br>Bumetanide, Triamterene,<br>Metolazone,<br>Hydrochlorothiazide [22] |
| Coagulopathy | Fresh frozen plasma:<br>replacement of coagulation<br>factors<br>Platelet concentrate: if platelet<br>count < 50,000/mm <sup>3</sup><br>Cryoprecipitate:<br>hypofibrinogenemia<br>Vitamin K: 10mg IV daily for<br>3days<br>[37] |                                                                                               |

|                                   |                                                                                                                                                                                                                                                                                                                                                                     |                                                                                                                                                                                    |
|-----------------------------------|---------------------------------------------------------------------------------------------------------------------------------------------------------------------------------------------------------------------------------------------------------------------------------------------------------------------------------------------------------------------|------------------------------------------------------------------------------------------------------------------------------------------------------------------------------------|
| Esophageal varices                | <p>Primary and secondary Prophylaxis of variceal bleeding</p> <p>Non-selective beta blockers</p> <p>Propranolol: 20-40mg PO 12 hourly, maximum 320mg/day in absence of ascites, 160mg/day in ascites</p> <p>Nadolol: 20-40mg PO daily, maximum 160mg/day in absence of ascites, 80mg/day in ascites</p> <p>Carvedilol: 6.25mg PO daily, maximum 12.5mg/day [26]</p> | <p>Vasoactive agents used for acute variceal bleeding:</p> <p>Octreotide</p> <p>Vasopressin</p> <p>Somatosatin</p> <p>Terlipressin [26]</p>                                        |
| Hepatic encephalopathy            | <p>Lactulose</p> <p>Treatment: 30-45 mL PO 1-2 hours until at least two soft stools/day, then reduce to 30-45 mL PO 6-8 hourly to produce 2-3 soft stools/day</p> <p>Prophylaxis: 30-45 mL PO, 6-8 hourly, adjusted until to produce 2-3 soft stools/day</p> <p>Rifaximin: 550mg PO 12 hourly [39]</p>                                                              | <p>Oral branched chain amino acids (BCAA)</p> <p>L-ornithine L-aspartate (LOLA)</p> <p>Neomycin</p> <p>Metronidazole [39]</p>                                                      |
| Jaundice                          | There is no specific treatment                                                                                                                                                                                                                                                                                                                                      |                                                                                                                                                                                    |
| Portal hypertension               | There is no specific treatment recommended in the absence of varices [26].                                                                                                                                                                                                                                                                                          |                                                                                                                                                                                    |
| Acute kidney injury               | <p>Withdrawal of nephrotoxic drugs, vasodilators, NSAIDs, diuretics, beta-blockers.</p> <p>Volume expansion with Albumin: 1g/kg for 2 days[6]</p>                                                                                                                                                                                                                   |                                                                                                                                                                                    |
| Spontaneous bacterial peritonitis | <p>Cefotaxime: 2g IV 8 hourly x 5 days</p> <p>Ceftriaxone: 1g 12 hourly or 2g daily x 5 days [23]</p>                                                                                                                                                                                                                                                               | <p>Ofloxacin: 400mg PO 12 hourly x 8 days</p> <p>Ciprofloxacin: 400mg IV 12 hourly, or 500mg PO 12 hourly x 5 days</p> <p>Levofloxacin: 500mg PO daily, or 750mg IV daily [23]</p> |
| Hyponatremia                      | <p>Normal saline in hypovolemic hyponatremia</p> <p>Restriction to 1liter/day in hypervolemic hyponatremia</p> <p>Hypertonic saline [6]</p>                                                                                                                                                                                                                         |                                                                                                                                                                                    |

**Appendix 6: Guidelines on safety prescription** (<https://www.drugsinlivercirrhosis.org>)

| <b>Drug</b>             | <b>Child-Pugh A</b>     | <b>Child-Pugh B</b>      | <b>Child-Pugh C</b>      |
|-------------------------|-------------------------|--------------------------|--------------------------|
| Metronidazole           | Not yet assessed        | Not yet assessed         | Not yet assessed         |
| Ciprofloxacin           | Not yet assessed        | Not yet assessed         | Not yet assessed         |
| Ceftriaxone             | Not yet assessed        | Not yet assessed         | Not yet assessed         |
| Metolazone              | Not yet assessed        | Not yet assessed         | Not yet assessed         |
| Glucose                 | Not yet assessed        | Not yet assessed         | Not yet assessed         |
| Dextrose 10%            | Not yet assessed        | Not yet assessed         | Not yet assessed         |
| Dextrose 5%             | Not yet assessed        | Not yet assessed         | Not yet assessed         |
| Dextrose 5%/saline 0.9% | Not yet assessed        | Not yet assessed         | Not yet assessed         |
| Vitamin B complex       | Not yet assessed        | Not yet assessed         | Not yet assessed         |
| Multivitamin            | Not yet assessed        | Not yet assessed         | Not yet assessed         |
| Pabrinex                | Not yet assessed        | Not yet assessed         | Not yet assessed         |
| Vitamin K               | Not yet assessed        | Not yet assessed         | Not yet assessed         |
| Hepatovit               | Not yet assessed        | Not yet assessed         | Not yet assessed         |
| Tothema                 | Not yet assessed        | Not yet assessed         | Not yet assessed         |
| Vitamin B complex       | Not yet assessed        | Not yet assessed         | Not yet assessed         |
| Multivitamin            | Not yet assessed        | Not yet assessed         | Not yet assessed         |
| Antacids                | Not yet assessed        | Not yet assessed         | Not yet assessed         |
| Folic acid              | Not yet assessed        | Not yet assessed         | Not yet assessed         |
| Ferrous sulphate        | Not yet assessed        | Not yet assessed         | Not yet assessed         |
| Iron dextran            | Not yet assessed        | Not yet assessed         | Not yet assessed         |
| Packed red cells        | Not yet assessed        | Not yet assessed         | Not yet assessed         |
| Whole blood             | Not yet assessed        | Not yet assessed         | Not yet assessed         |
| Albumin                 | Safe                    | Safe                     | Safe                     |
| Fresh frozen plasma     | Not yet assessed        | Not yet assessed         | Not yet assessed         |
| Sorafenib               | Not yet assessed        | Not yet assessed         | Not yet assessed         |
| Thiamine                | Not yet assessed        | Not yet assessed         | Not yet assessed         |
| Baclofen                | Not yet assessed        | Not yet assessed         | Not yet assessed         |
| Furosemide              | Safe                    | Safe                     | Safe                     |
| Spirolactone            | Safe                    | Safe                     | Safe                     |
| Furosemide              | Safe                    | Safe                     | Safe                     |
| Paracetamol             | Safe                    | Safe                     | Safe                     |
| Lactulose               | Safe                    | Safe                     | Safe                     |
| Propranolol             | Safe                    | Safe                     | Safe                     |
| Tenofovir               | Safe                    | Safe                     | Safe                     |
| Lamivudine              | Safe                    | Safe                     | Safe                     |
| Tramadol                | No adverse effect known | No adverse effects known | No adverse effects known |
| Morphine                | No adverse effect known | No adverse effect known  | No adverse effect known  |
| Pethidine               | No adverse effect known | No adverse effect known  | Unknown                  |
| Omeprazole              | No adverse effect known | No adverse effect known  | Unsafe                   |

|                       |                          |                          |                          |
|-----------------------|--------------------------|--------------------------|--------------------------|
| Sofosbuvir/Ledipasvir | No adverse effects known | No adverse effects known | No adverse effects known |
| Ribavirin             | No adverse effects known | Adverse effects known    | Adverse effects known    |
| Diazepam              | Adverse effects known    | Adverse effects known    | Adverse effects known    |

**Appendix7: Dosing consideration in hepatic impairment** (<https://www.medscape.com>)

| <b>Drug class</b> | <b>Child-Pugh A</b>                                                                                        | <b>Child-Pugh B</b>                                                                                       | <b>Child-Pugh C</b>                                                                                        |
|-------------------|------------------------------------------------------------------------------------------------------------|-----------------------------------------------------------------------------------------------------------|------------------------------------------------------------------------------------------------------------|
| Metronidazole     | No dosage adjustment                                                                                       | No dosage adjustment                                                                                      | Reduce dose by 50%                                                                                         |
| Ciprofloxacin     | No dosage adjustment                                                                                       | No dosage adjustment                                                                                      | No dosage adjustment                                                                                       |
| Ceftriaxone       | No dosage adjustment                                                                                       | Not yet assessed                                                                                          | Not yet assessed                                                                                           |
| Furosemide        | No dosage adjustment                                                                                       | No dosage adjustment                                                                                      | No dosage adjustment                                                                                       |
| Spironolactone    | No dosage adjustment                                                                                       | No dosage adjustment                                                                                      | No dosage adjustment                                                                                       |
| Metolazone        | No dosage adjustment                                                                                       | No dosage adjustment                                                                                      | No dosage adjustment                                                                                       |
| Glucose           | No dosage adjustment                                                                                       | No dosage adjustment                                                                                      | No dosage adjustment                                                                                       |
| Dextrose 10%      | No dosage adjustment                                                                                       | No dosage adjustment                                                                                      | No dosage adjustment                                                                                       |
| Dextrose 5%       | No dosage adjustment                                                                                       | No dosage adjustment                                                                                      | No dosage adjustment                                                                                       |
| Dextrose/saline   | No dosage adjustment                                                                                       | No dosage adjustment                                                                                      | No dosage adjustment                                                                                       |
| Tramadol          | No dosage adjustment                                                                                       | No dosage adjustment                                                                                      | Immediate release, 50mg orally 12 hourly                                                                   |
| Paracetamol PO    | Use extreme caution; avoid use as much as possible; Limit therapy to short- term use at doses not > 2g/day | Use extreme caution; avoid use as much as possible; Limit therapy to short-term use at doses not > 2g/day | Use extreme caution; avoid use as much as possible; Limit therapy to short- term use at doses not > 2g/day |

|                   |                                                                                           |                                                                                           |                                                                                           |
|-------------------|-------------------------------------------------------------------------------------------|-------------------------------------------------------------------------------------------|-------------------------------------------------------------------------------------------|
|                   |                                                                                           |                                                                                           |                                                                                           |
| Morphine          | Consider lowest end of dosing range and monitor side effects                              | Consider lowest end of dosing range and monitor side effects                              | Consider lowest end of dosing range and monitor side effects                              |
| Pethidine         | Consider lower limit initial dose initially; increase opioid effect possible in cirrhosis | Consider lower limit initial dose initially; increase opioid effect possible in cirrhosis | Consider lower limit initial dose initially; increase opioid effect possible in cirrhosis |
| Vitamin B complex | No dosage adjustment                                                                      | No dosage adjustment                                                                      | No dosage adjustment                                                                      |
| Multivitamin      | No dosage adjustment                                                                      | No dosage adjustment                                                                      | No dosage adjustment                                                                      |
| Pabrinex          | No dosage adjustment                                                                      | No dosage adjustment                                                                      | No dosage adjustment                                                                      |
| Vitamin K         | No dosage adjustment                                                                      | No dosage adjustment                                                                      | No dosage adjustment                                                                      |
| Hepatovit         | No dosage adjustment                                                                      | No dosage adjustment                                                                      | No dosage adjustment                                                                      |
| Omeprazole        | Maximum 20mg daily                                                                        | Maximum 20mg daily                                                                        | No dosing advice                                                                          |
| Antacids          | No dosage adjustment                                                                      | No dosage adjustment                                                                      | No dosage adjustment                                                                      |
| Lactulose         | No dosage adjustment                                                                      | No dosage adjustment                                                                      | No dosage adjustment                                                                      |
| Folic acid        | No dosage adjustment                                                                      | No dosage adjustment                                                                      | No dosage adjustment                                                                      |
| Ferrous sulphate  | No dosage adjustment                                                                      | No dosage adjustment                                                                      | No dosage adjustment                                                                      |
| Iron dextran      | No dosage adjustment                                                                      | No dosage adjustment                                                                      | No dosage adjustment                                                                      |
| Packed red cells  | No dosage adjustment                                                                      | No dosage adjustment                                                                      | No dosage adjustment                                                                      |
| Albumin           | No dosage adjustment                                                                      | No dosage adjustment                                                                      | No dosage adjustment                                                                      |

|                              |                          |                          |                          |
|------------------------------|--------------------------|--------------------------|--------------------------|
| Fresh frozen plasma          | No dosage adjustment     | No dosage adjustment     | No dosage adjustment     |
| Propranolol                  | No dosage adjustment     | No dosage adjustment     | No dosage adjustment     |
| Tenofovir disproxil fumarate | No dosage adjustment     | No dosage adjustment     | No dosage adjustment     |
| Lamivudine                   | No dosage adjustment     | No dosage adjustment     | No dosage adjustment     |
| Sofosbuvir/<br>Ledipasvir    | No dosage adjustment     | No dosage adjustment     | No dose adjustment       |
| Ribavirin                    | No dosage adjustment     | No dosage adjustment     | No dosage adjustment     |
| Sorafenib                    | No dosage adjustment     | No dosage adjustment     | Not studied              |
| Thiamine                     | No dosage adjustment     | No dosage adjustment     | No dosage adjustment     |
| Baclofen                     | No dosage adjustment     | No dosage adjustment     | No dosage adjustment     |
| Diazepam                     | Half of maintenance dose | Half of maintenance dose | Half of maintenance dose |
